# Supplementary material
Source: MDPI journal article supplement (https://www.mdpi.com/1424-2818/16/3/165)
Supplement: s1 [file s1]

**Supplementary Table S1.** All Pezizales fungi collected and tested for germination and growth in axenic culture. Taxa for which no germination date is listed did not successfully germinate in culture.

| Herbarium<br>ID/Collection<br>ID | Taxon                               | Media    | Collection<br>Date | Inoculation<br>date | Germination<br>Date |
|----------------------------------|-------------------------------------|----------|--------------------|---------------------|---------------------|
| JV202                            | <i>Aleuria</i> sp.                  | MEA & WA | Sep-25<br>2021     | Apr-5<br>2022       |                     |
| FLAS-F-68423                     | <i>Aleuria aurantia</i>             | MEA & WA | Sep-6<br>2021      | Jan-24<br>2022      |                     |
| JV213                            | <i>Aleuria aurantia</i>             | MEA & WA | Oct-5<br>2020      | Mar-31<br>2022      |                     |
| FLAS-F-68218                     | <i>Galiella</i> sp.                 | MEA & WA | Aug-16<br>2021     | Feb-14<br>2022      | Feb-19 2022         |
| FLAS-F-68574                     | <i>Galiella rufa</i>                | PDA      | Aug-12<br>2021     | Jan-17<br>2022      | Jan-24 2022         |
| MSC0286084                       | <i>Gyromitra venenata</i>           | MEA & WA | May-23<br>2021     | Mar-31<br>2022      | Apr-1 2022          |
| JV259                            | <i>Gyromitra</i> cf. <i>perlata</i> | MEA & WA | Apr-22<br>2021     | Apr-5<br>2022       |                     |
| FLAS-F-68436                     | <i>Helvella</i> sp.                 | MMN & WA | Sep-9<br>2021      | Mar-21<br>2022      |                     |
| FLAS-F-68434                     | <i>Helvella</i> cf. <i>crispa</i>   | MMN & WA | Sep-6<br>2021      | Mar-14<br>2022      |                     |
| FLAS-F-68437                     | <i>Humaria</i> sp.                  | MMN & WA | Sep-6<br>2021      | Mar-14<br>2022      |                     |
| FLAS-F-68655                     | <i>Jafnea semitosta</i>             | MEA & WA | Sep-8<br>2021      | Jan-24<br>2022      |                     |
| FLAS-F-68766                     | <i>Legaliana</i> sp.                | MEA & WA | Sep-10<br>2021     | Jan-31<br>2022      |                     |
| JV413                            | <i>Legaliana</i> sp.                | MMN & WA | Nov-3<br>2021      | Mar-21<br>2022      |                     |
| FLAS-F-68601                     | <i>Legaliana</i> sp.                | MMN & WA | Aug-13<br>2021     | Mar-21<br>2022      |                     |
| FLAS-F-68704                     | <i>Leucosypha</i> sp.               | MMN & WA | Sep-9<br>2021      | Mar-21<br>2022      |                     |
| MSC0286085                       | <i>Morchella angusticeps</i>        | MEA & WA | May-1<br>2021      | Apr-5<br>2022       | Apr-6 2022          |
| JV431                            | <i>Octospora</i> sp.                | MEA & WA | Jan-7 2022         | Jan-13<br>2022      |                     |
| FLAS-F-68679                     | <i>Otidea</i> sp.                   | MMN & WA | Sep-9<br>2021      | Mar-14<br>2022      |                     |
| FLAS-F-68217                     | <i>Otidea</i> sp.                   | MEA & WA | Aug-16<br>2021     | Jan-27<br>2022      |                     |
| FLAS-F-68566                     | <i>Paragalactina</i> sp.            | MEA & WA | Aug-12<br>2021     | Mar-28<br>2022      |                     |
| JV420                            | <i>Peziza</i> sp.                   | MEA & WA | Nov-1<br>2021      | Mar-28<br>2022      |                     |

|              |                                         |          |                  |                |             |
|--------------|-----------------------------------------|----------|------------------|----------------|-------------|
| JV421        | <i>Peziza</i> sp.                       | MEA & WA | Nov-1<br>2021    | Feb-28<br>2022 |             |
| JV436        | <i>Peziza</i> sp.                       | MEA & WA | Oct-27<br>2021   | Feb-28<br>2022 |             |
| JV413        | <i>Peziza</i> sp.                       | MEA & WA | Nov-3<br>2021    | Feb-28<br>2022 |             |
| JV419        | <i>Peziza</i> sp.                       | MEA & WA | Nov-1<br>2021    | Feb-28<br>2022 |             |
| MSC0286082   | <i>Peziza varia</i> species complex sp. | MEA & WA | May-23<br>2021   | Apr-12<br>2022 | Apr-14 2022 |
| JV436        | <i>Peziza</i> sp.                       | MEA & WA | Oct-17<br>2021   | Mar-28<br>2022 |             |
| FLAS-F-68216 | <i>Peziza atrovinosa</i>                | MEA & WA | Aug-2021<br>2021 | Jan-13<br>2022 |             |
| FLAS-F-68233 | <i>Peziza griseorosea</i>               | MEA & WA | Aug-16<br>2021   | Jan-13<br>2022 | Jan-24 2022 |
| FLAS-F-68375 | <i>Peziza griseorosea</i>               | MEA & WA | Aug-13<br>2021   | Jan-13<br>2022 | Feb-14 2022 |
| JV249        | <i>Peziza</i> sp.                       | MEA & WA | Mar-31<br>2021   | Mar-28<br>2022 | Apr-23 2022 |
| NSF-BSF-84   | <i>Peziza succosa</i>                   | MEA & WA | Aug-12<br>2021   | Jan-17<br>2022 |             |
| FLAS-F-68232 | <i>Peziza succosa</i>                   | MEA & WA | Aug-16<br>2021   | Feb-7<br>2022  |             |
| MSC0286086   | <i>Peziza varia</i> species complex sp. | MEA & WA | Oct-15<br>2021   | Jan-25<br>2022 | Jan-28 2022 |
| MSC0286088   | <i>Peziza varia</i> species complex sp. | MEA & WA | Oct-11<br>2021   | Feb-21<br>2022 | Feb-22 2022 |
| MSC0286087   | <i>Peziza varia</i> species complex sp. | MEA & WA | Apr-17<br>2021   | Mar-28<br>2022 | Mar-29 2022 |
| MSC0286080   | <i>Peziza</i> sp. 1                     | MEA & WA | Oct-5<br>2020    | Mar-31<br>2022 | Apr-11 2022 |
| MSC0286083   | <i>Phylloscypha phyllogena</i>          | MMN & WA | May-23<br>2021   | Apr-12<br>2022 | Apr-25 2022 |
| FLAS-F-68602 | <i>Plicariella</i> sp.                  | MMN & WA | Aug-13<br>2021   | Feb-18<br>2022 |             |
| FLAS-F-68770 | <i>Plicariella</i> sp.                  | MMN & WA | Sep-10<br>2021   | Mar-21<br>2022 |             |
| FLAS-F-68342 | <i>Plicariella</i> sp.                  | MMN & WA | Sep-5<br>2021    | Mar-21<br>2022 |             |
| MSC0286081   | <i>Pseudoplectania</i> sp.              | MEA & WA | May-23<br>2021   | Apr-5<br>2022  | Apr-6 2022  |
| FLAS-F-68775 | <i>Pulvinula</i> sp.                    | MMN & WA | Sep-10<br>2021   | Apr-18<br>2022 |             |
| FLAS-F-68410 | <i>Ramsbottomia</i> sp.                 | MMN & WA | Sep-6<br>2021    | Apr-18<br>2022 |             |
| FLAS-F-68215 | <i>Sarcoscypha occidentalis</i>         | MEA & WA | Aug-16<br>2021   | Jan-31<br>2022 | Feb-7 2022  |

|              |                                 |          |                |                |             |
|--------------|---------------------------------|----------|----------------|----------------|-------------|
| FLAS-F-68662 | <i>Sarcoscypha occidentalis</i> | MEA & WA | Sep-8<br>2021  | Feb-14<br>2022 | Feb-23 2022 |
| FLAS-F-68705 | <i>Scutellinia</i> sp.          | MEA & WA | Sep-9<br>2021  | Jan-13<br>2022 |             |
| FLAS-F-68459 | <i>Scutellinia</i> sp.          | MEA & WA | Aug-14<br>2021 | Mar-28<br>2022 |             |
| FLAS-F-68510 | <i>Scutellinia</i> sp.          | MEA & WA | Sep-7<br>2021  | Jan-31<br>2022 | Feb-15 2022 |
| MSC0286078   | <i>Scutellinia</i> sp.          | MEA & WA | Jul-12<br>2021 | Apr-5<br>2022  | Apr-15 2022 |
| JV358        | <i>Sphaerosporella brunnea</i>  | MEA & WA | Jan-7 2022     | Jan-13<br>2022 | Jan-17 2022 |
| FLAS-F-68781 | <i>Tricharina</i> sp.           | MEA & WA | Sep-10<br>2021 | Jan-24<br>2022 |             |
| JV407        | <i>Tricophaea</i> sp.           | MMN & WA | Nov-4<br>2021  | Feb-18<br>2022 |             |
| FLAS-F-68776 | <i>Wilcoxina</i> sp.            | MMN & WA | Sep-10<br>2021 | Mar-21<br>2022 |             |
| FLAS-F-68467 | <i>Wynnea americana</i>         | MEA & WA | Aug-14<br>2021 | Feb-1<br>2022  |             |
