# Supplementary material
Source: MDPI journal article supplement (https://www.mdpi.com/1424-2818/16/3/165)
Supplement: s1 [file s1]

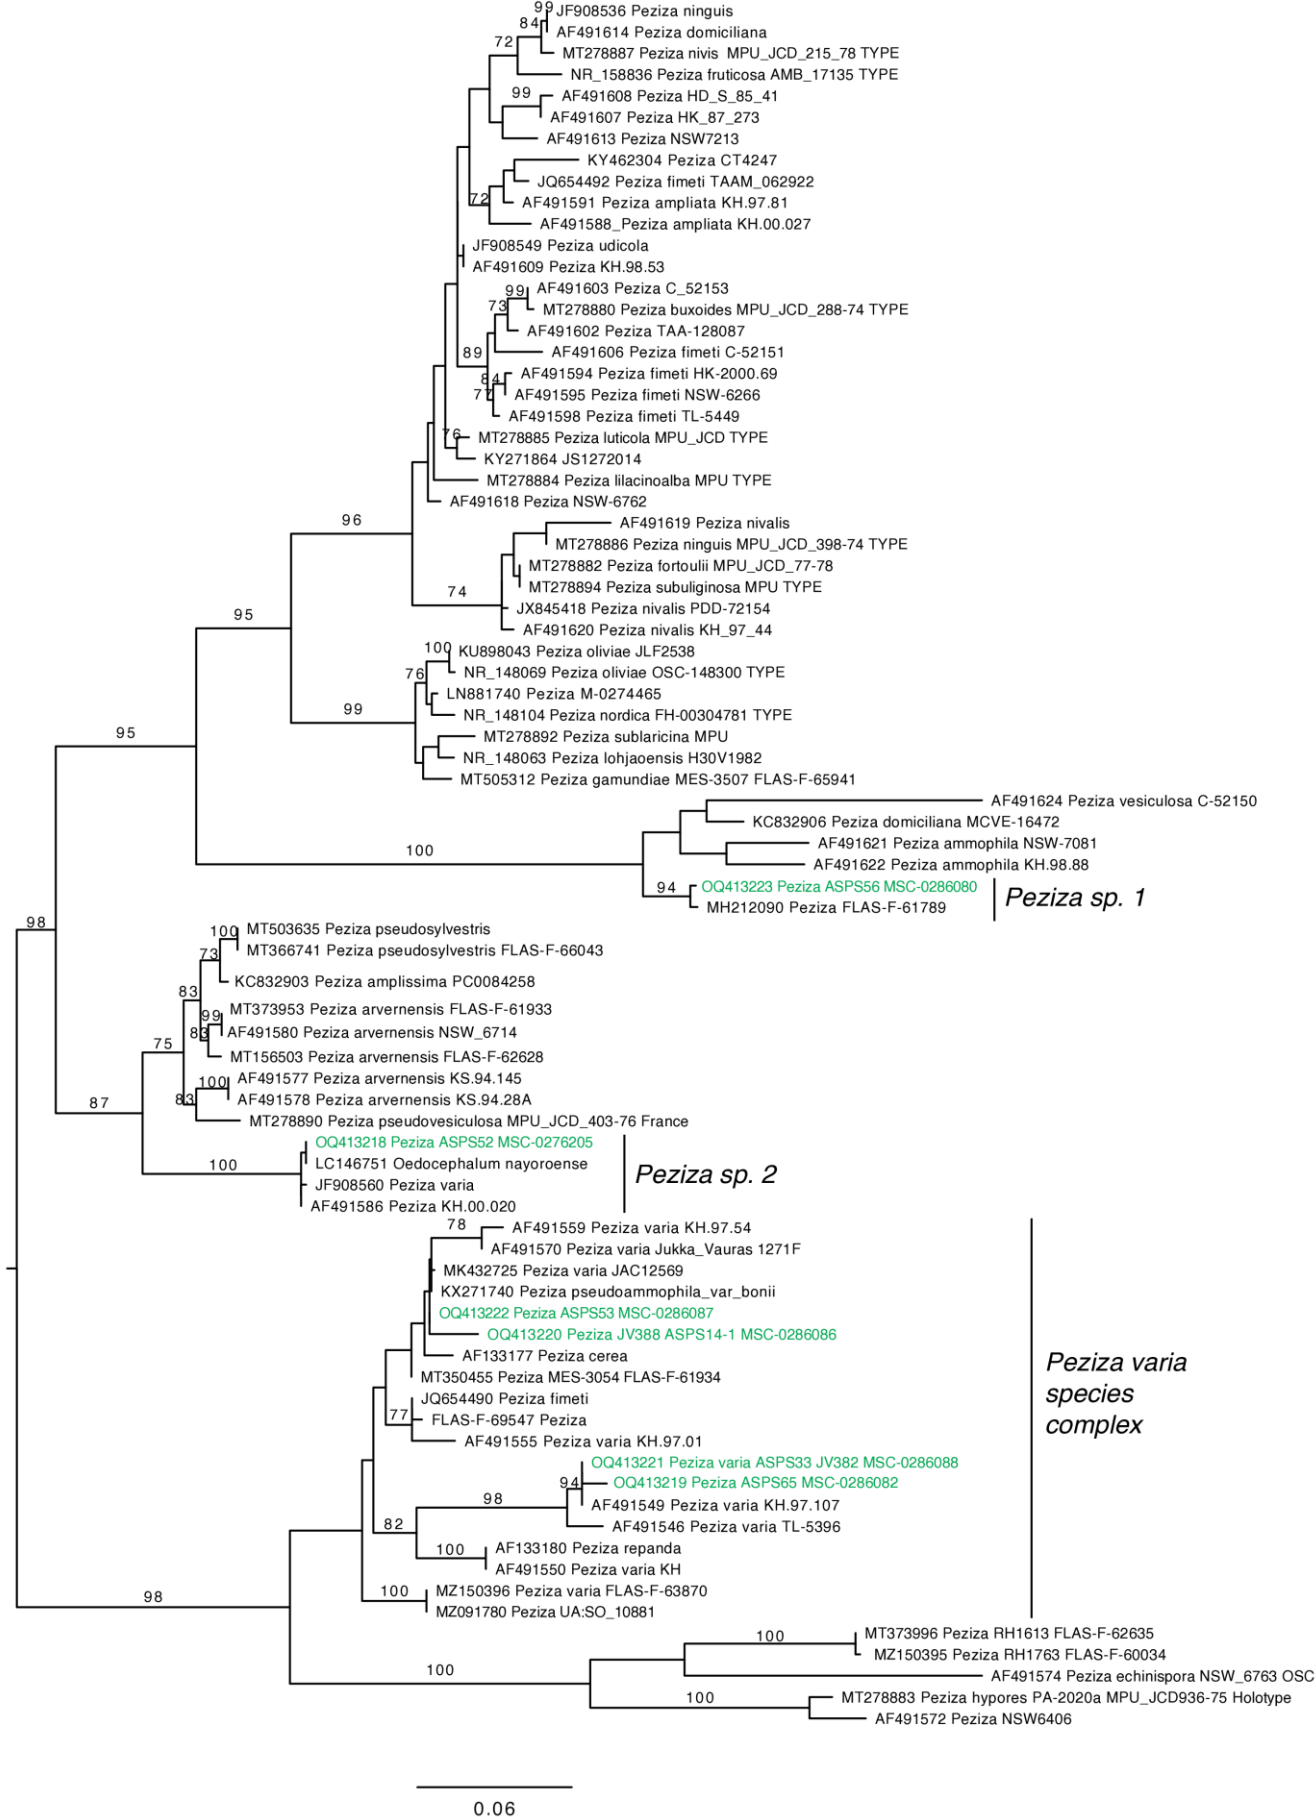

**Supplementary Figure S2.** Most likely RAxML phylogenetic tree showing placement of single-spore isolates among other *Peziza* isolates. Significant support is denoted by bootstrap values  $\geq 70\%$  at nodes. Green taxa represent isolates that germinated and grew in axenic culture for this study.

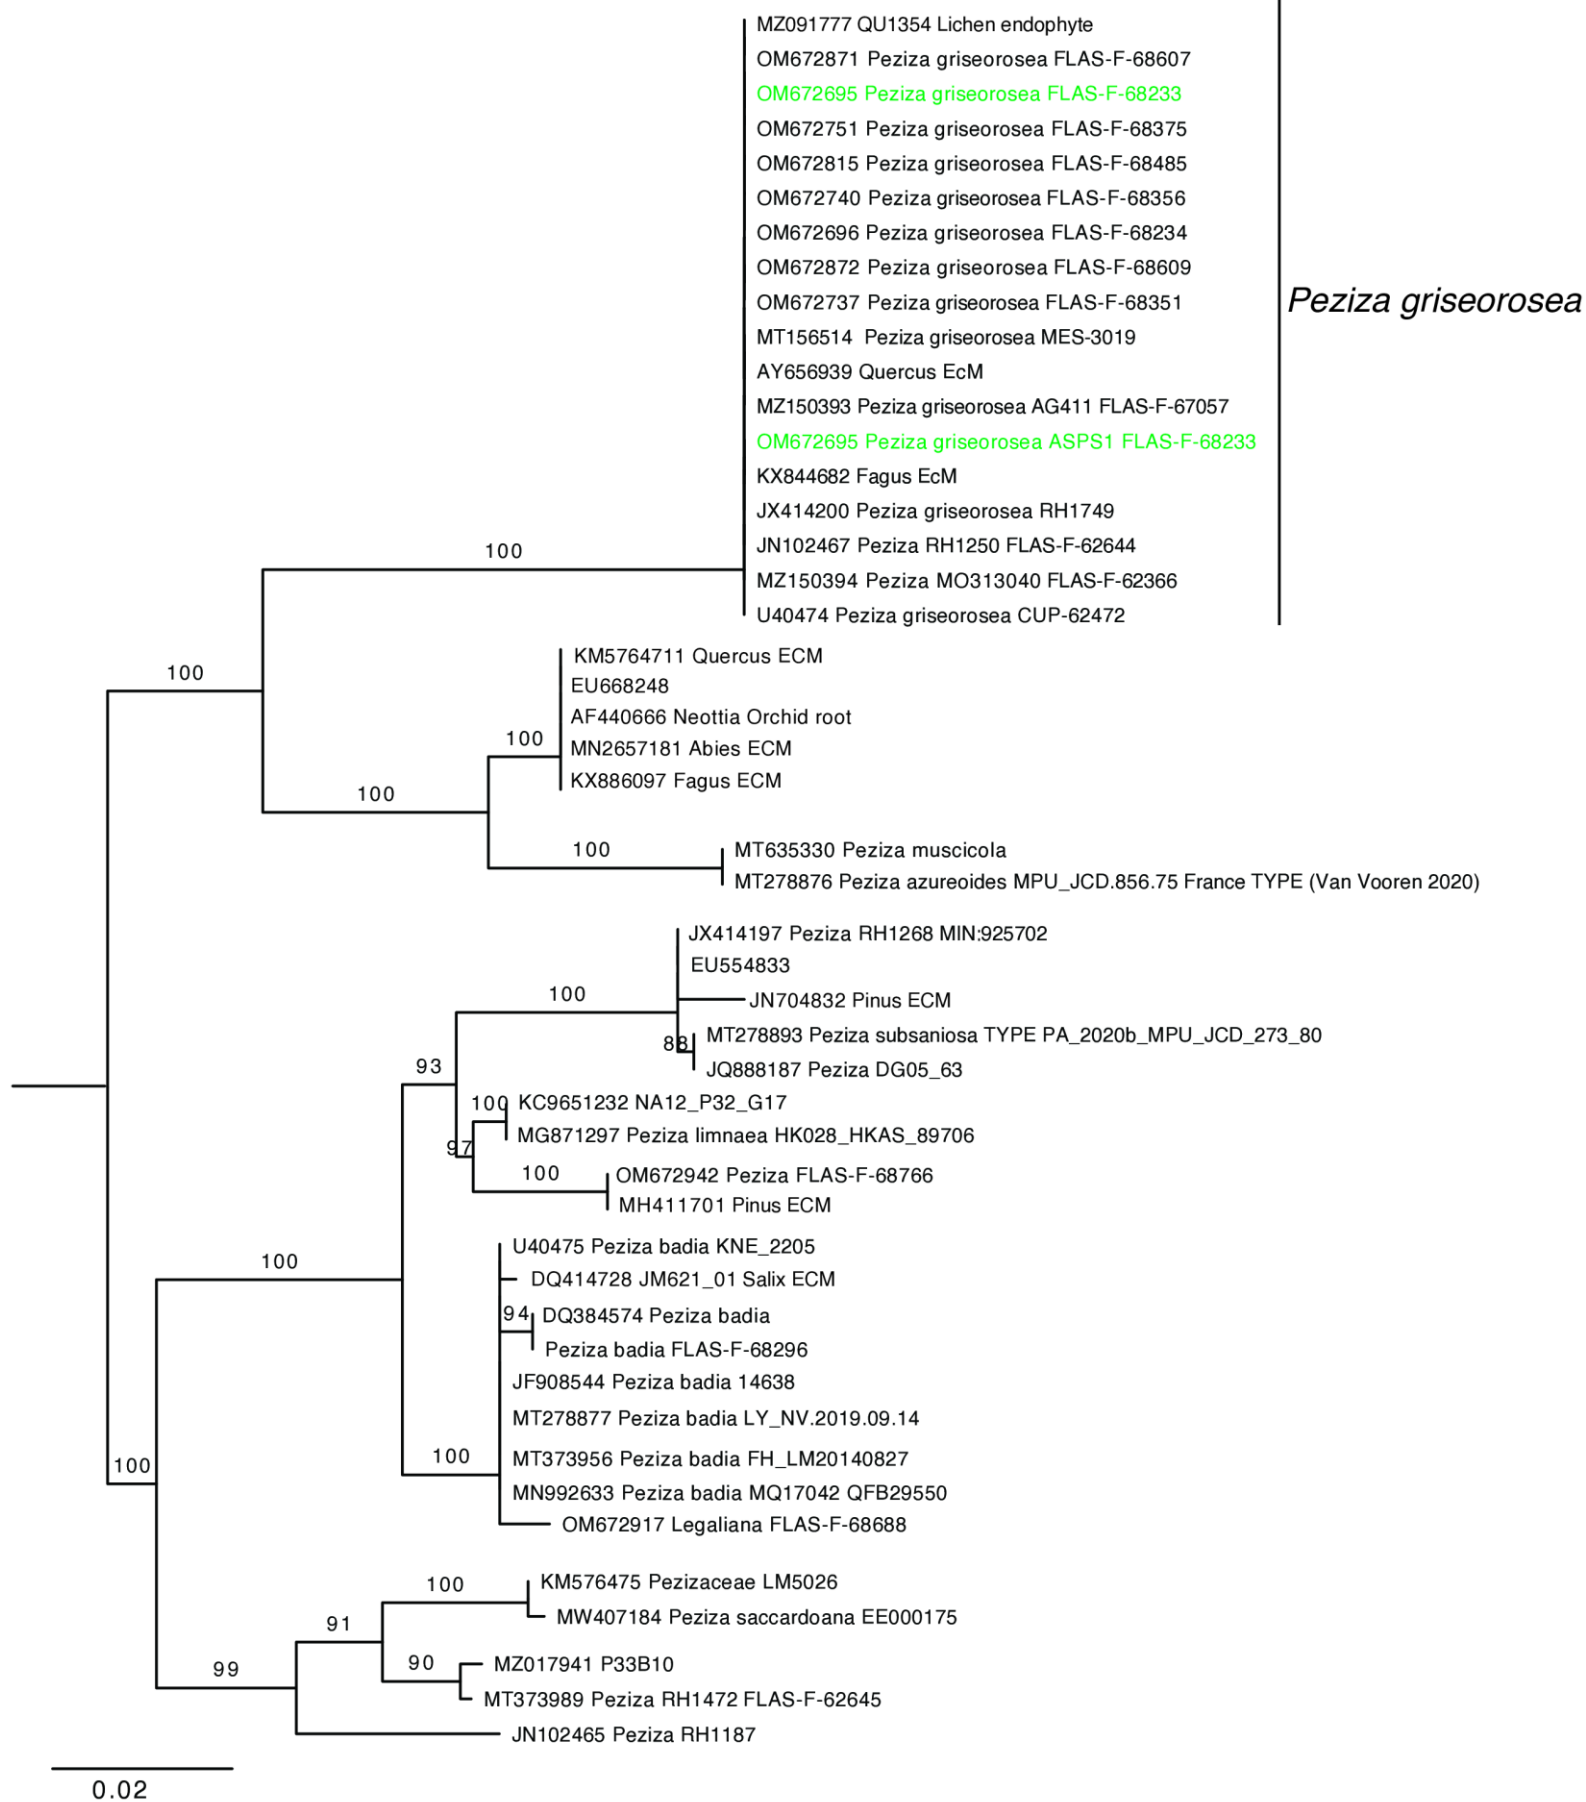

**Supplementary Figure S3.** Most likely RAxML phylogenetic tree showing placement of single-spore isolates among other *Peziza griseorosea* isolates. Significant support is denoted by bootstrap values  $\geq 70\%$  at nodes. Green taxa represent isolates that germinated and grew in axenic culture for this study.

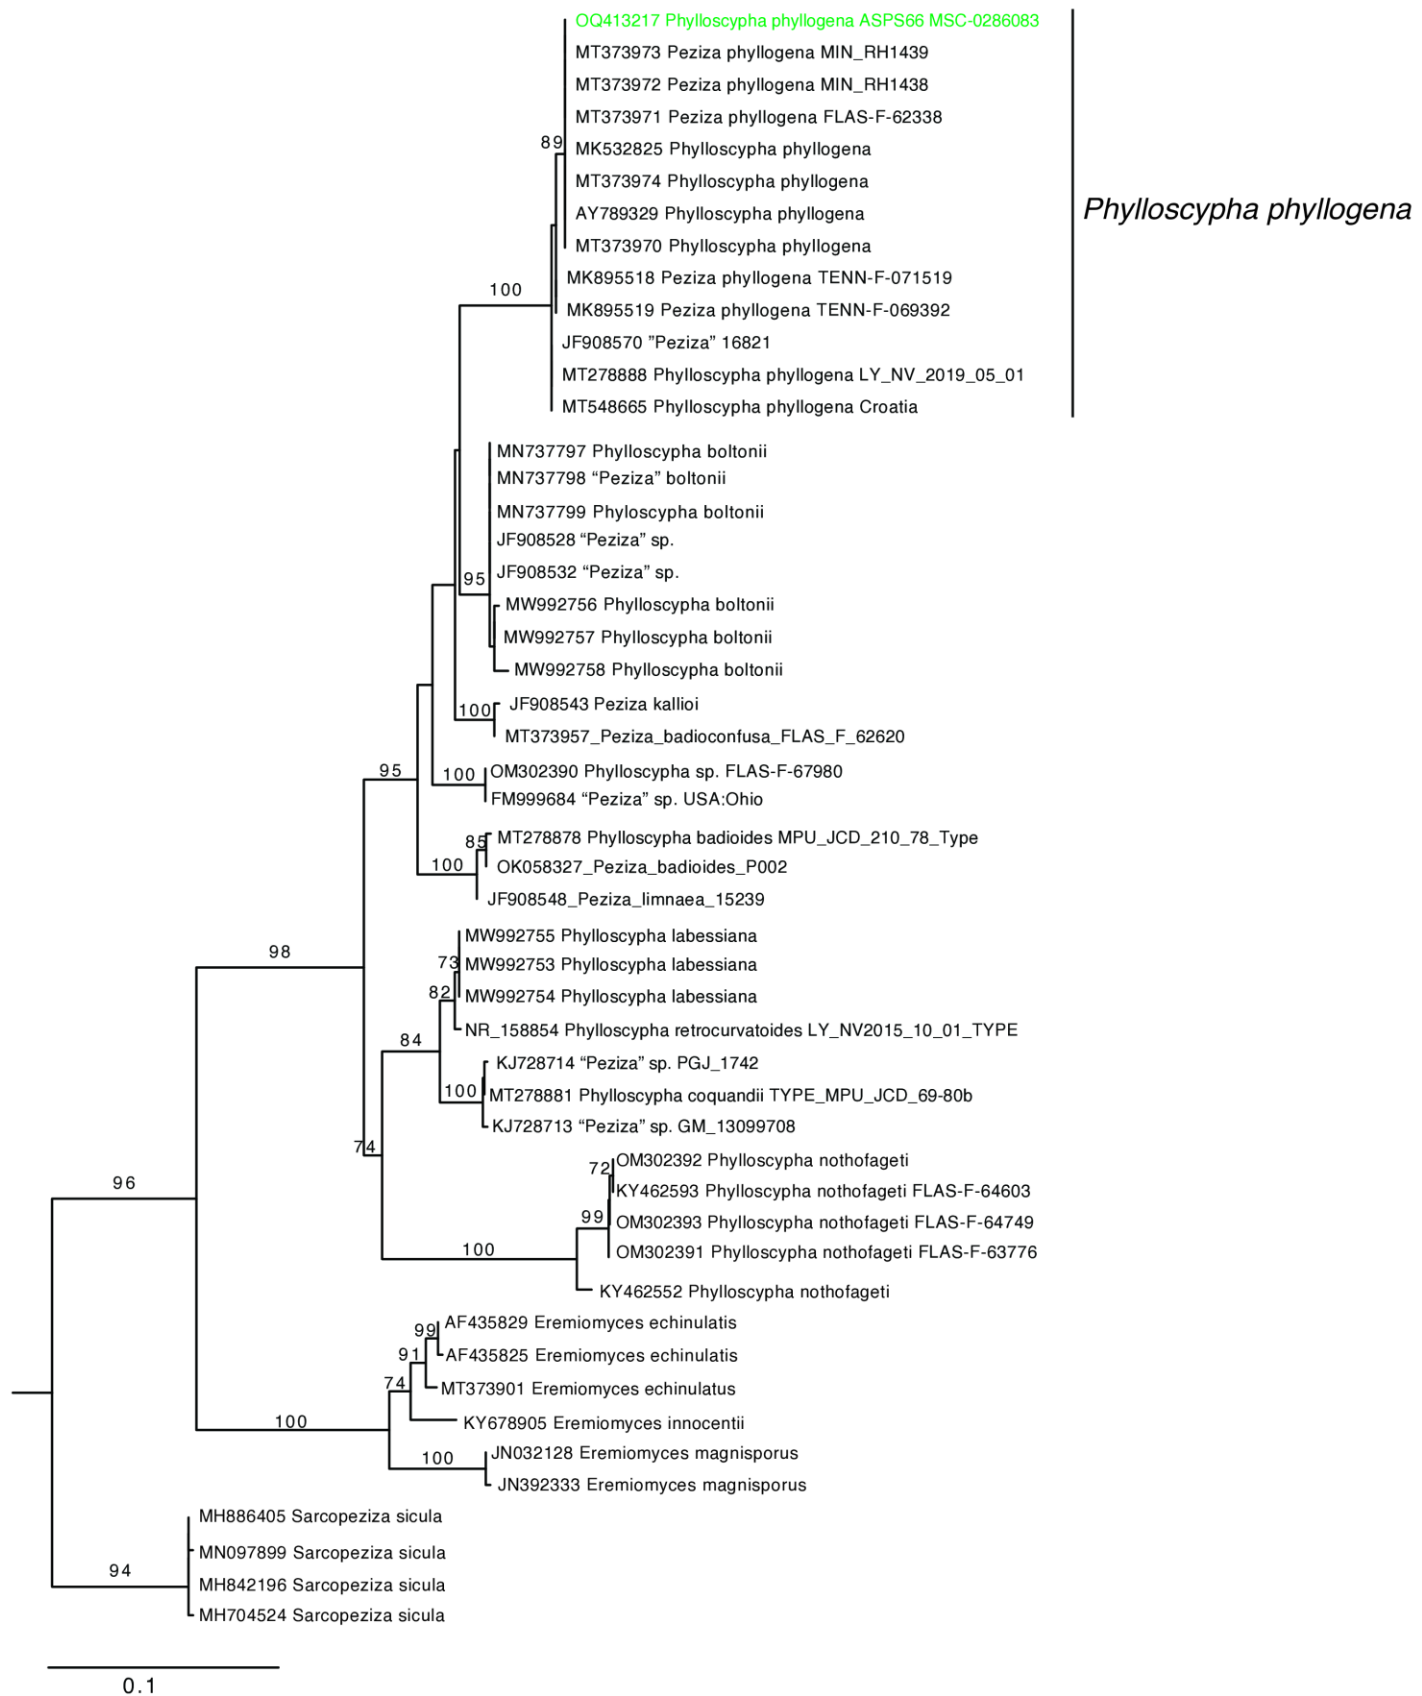

**Supplementary Figure S4.** Most likely RAxML phylogenetic tree showing placement of single-spore isolates among other *Phylloscypha* isolates. Significant support is denoted by bootstrap values  $\geq 70\%$  at nodes. Green taxa represent isolates that germinated and grew in axenic culture for this study.

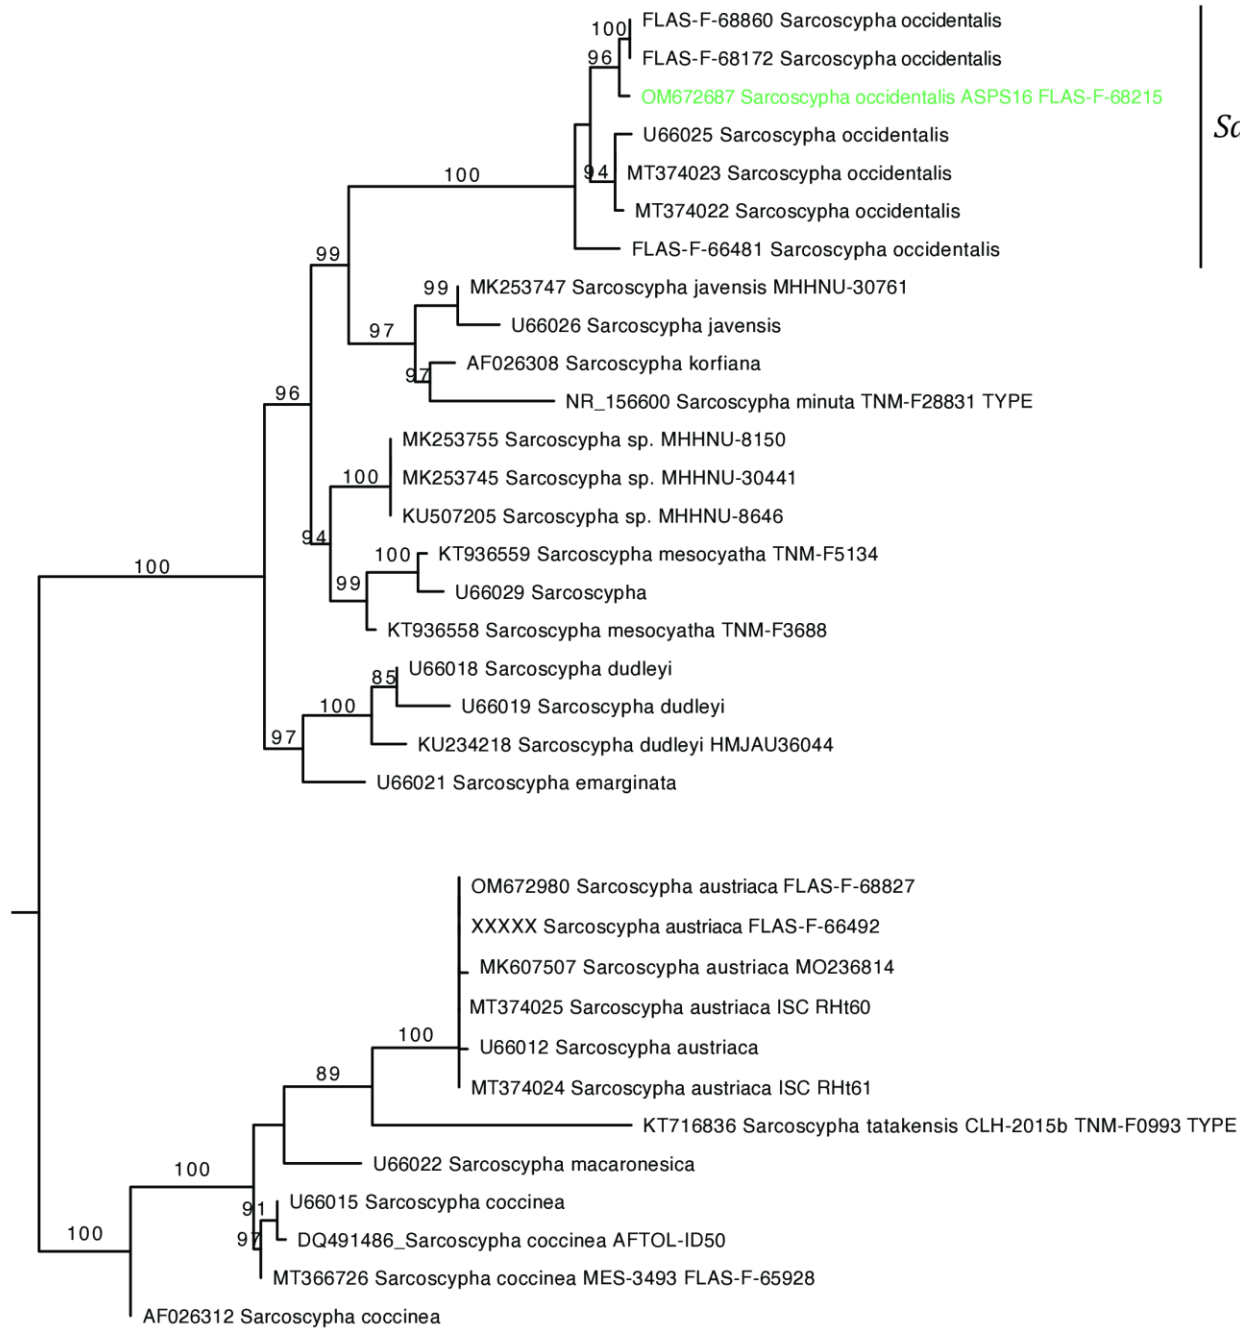

*Sarcoscypha occidentalis*

0.03

**Supplementary Figure S5.** Most likely RAxML phylogenetic tree showing placement of single-spore isolates among other *Sarcoscypha* isolates. Significant support is denoted by bootstrap values  $\geq 70\%$  at nodes. Green taxa represent isolates that germinated and grew in axenic culture for this study.

# Supplementary Figure S6.

Most likely RAxML

phylogenetic tree showing placement of single-spore isolates among other

*Scutellinia* isolates.

Significant support is denoted by bootstrap values  $\geq 70\%$  at nodes. Green taxa represent isolates that germinated and grew in axenic culture for this study.

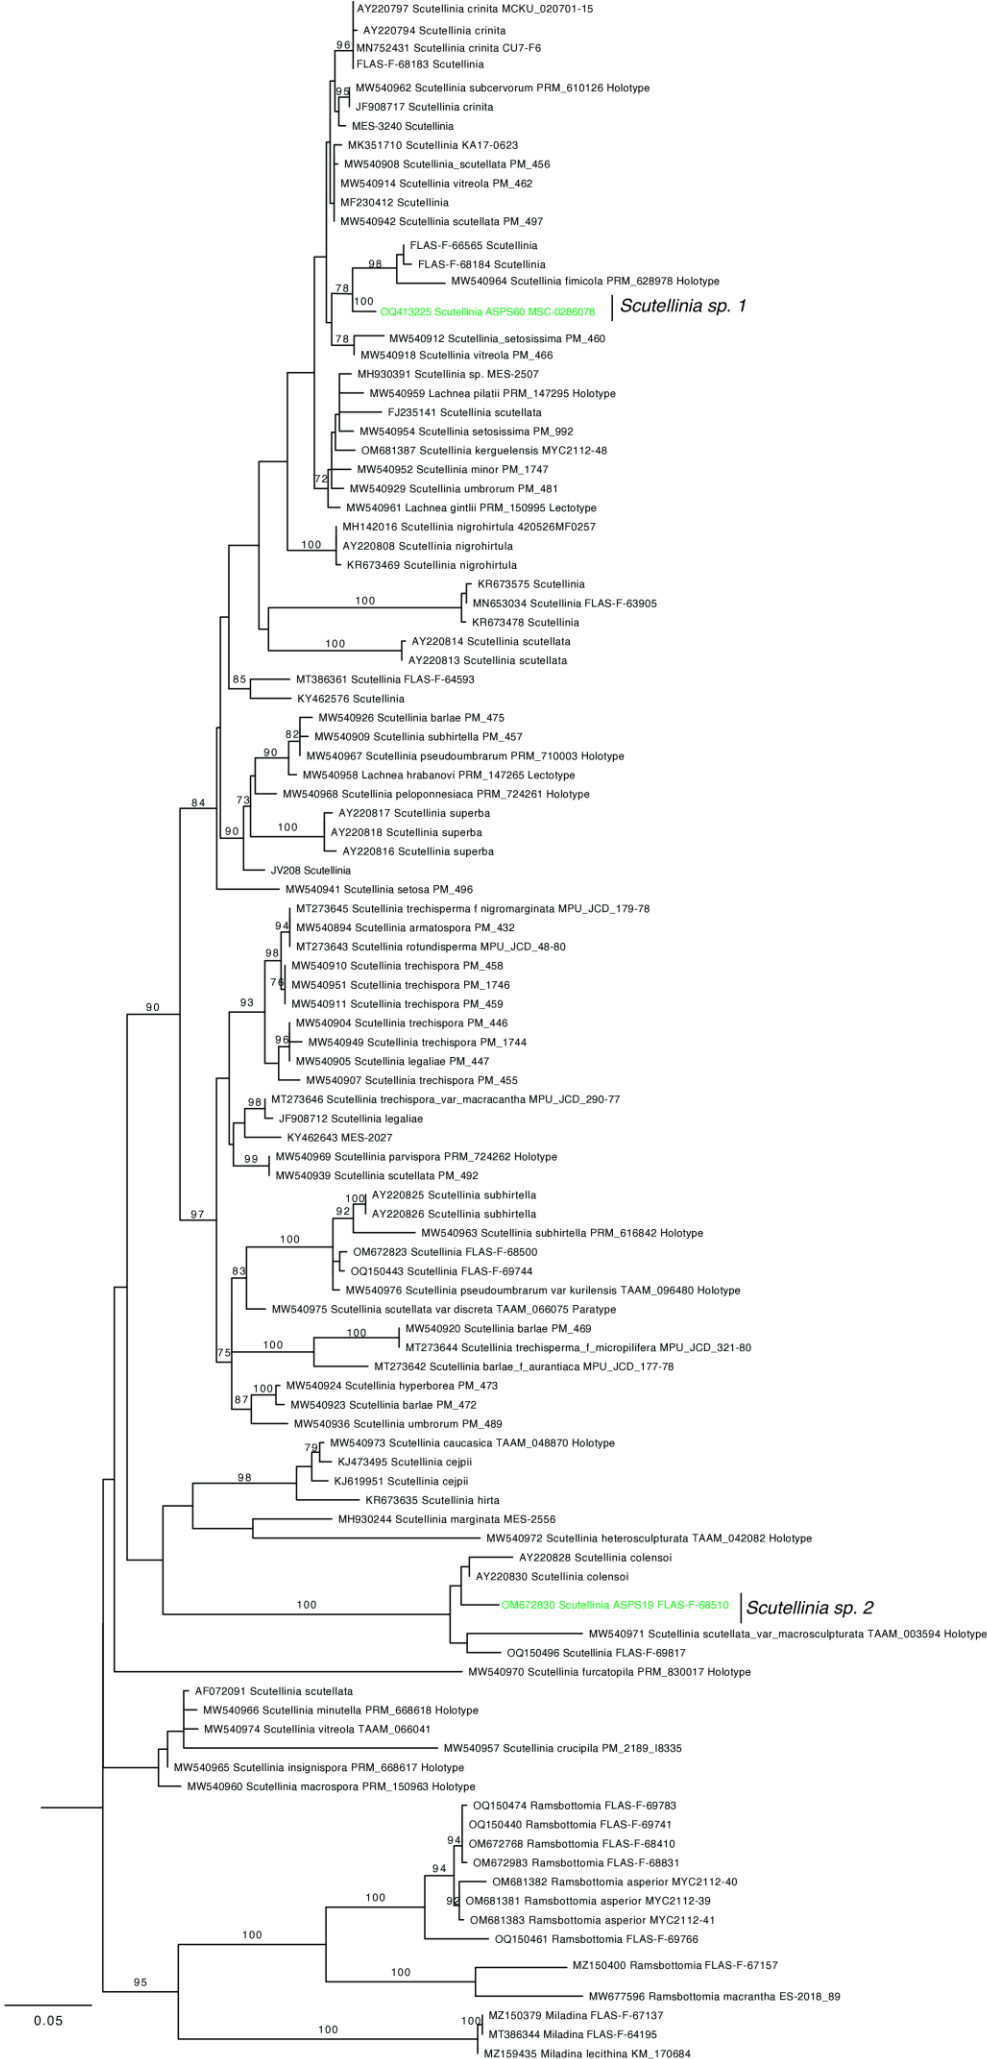



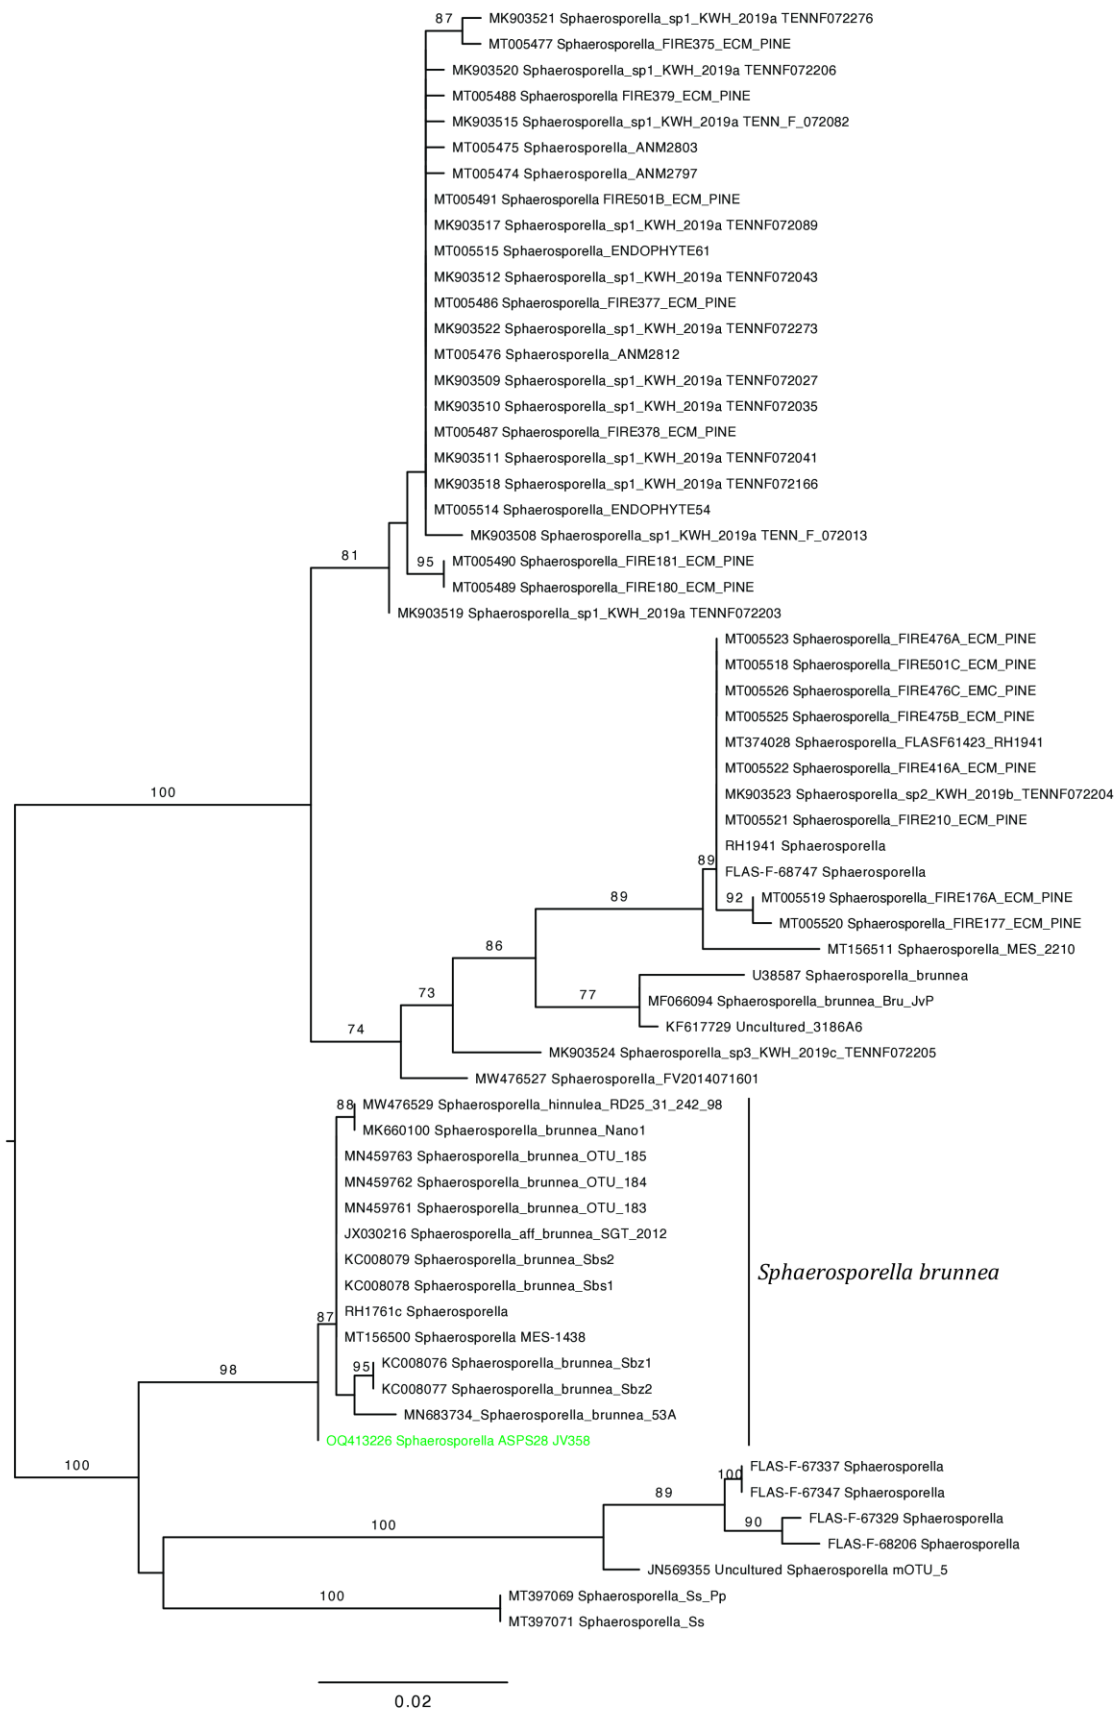

**Supplementary Figure S7.** Most likely RAXML phylogenetic tree showing placement of single-spore isolates among other *Sphaerosporella* isolates. Significant support is denoted by bootstrap values  $\geq 70\%$  at nodes. Green taxa represent isolates that germinated and grew in axenic culture for this study.

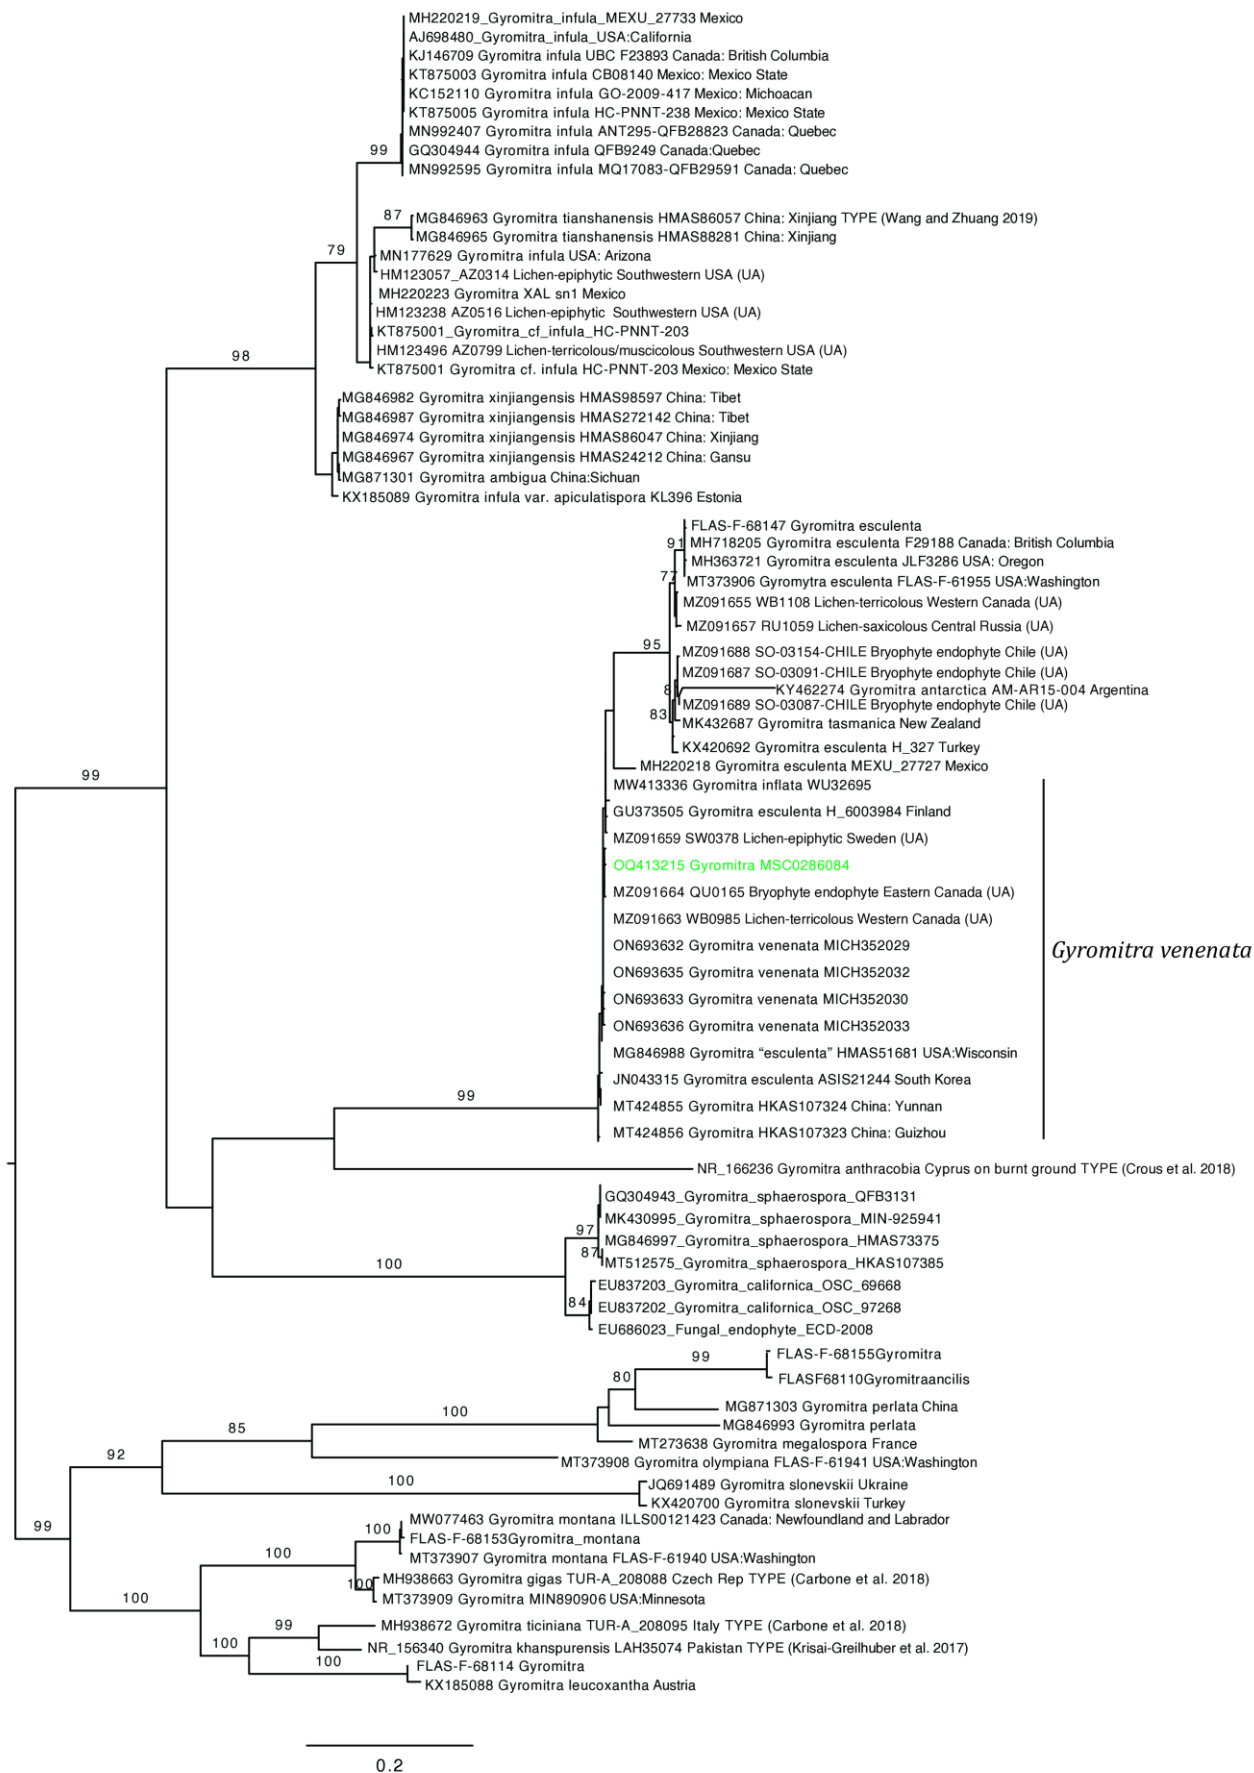

**Supplementary Figure S8.** Most likely RAxML phylogenetic tree showing placement of single-spore isolates among other *Gyromitra* isolates. Significant support is denoted by bootstrap values  $\geq 70\%$  at nodes. Green taxa represent isolates that germinated and grew in axenic culture for this study.



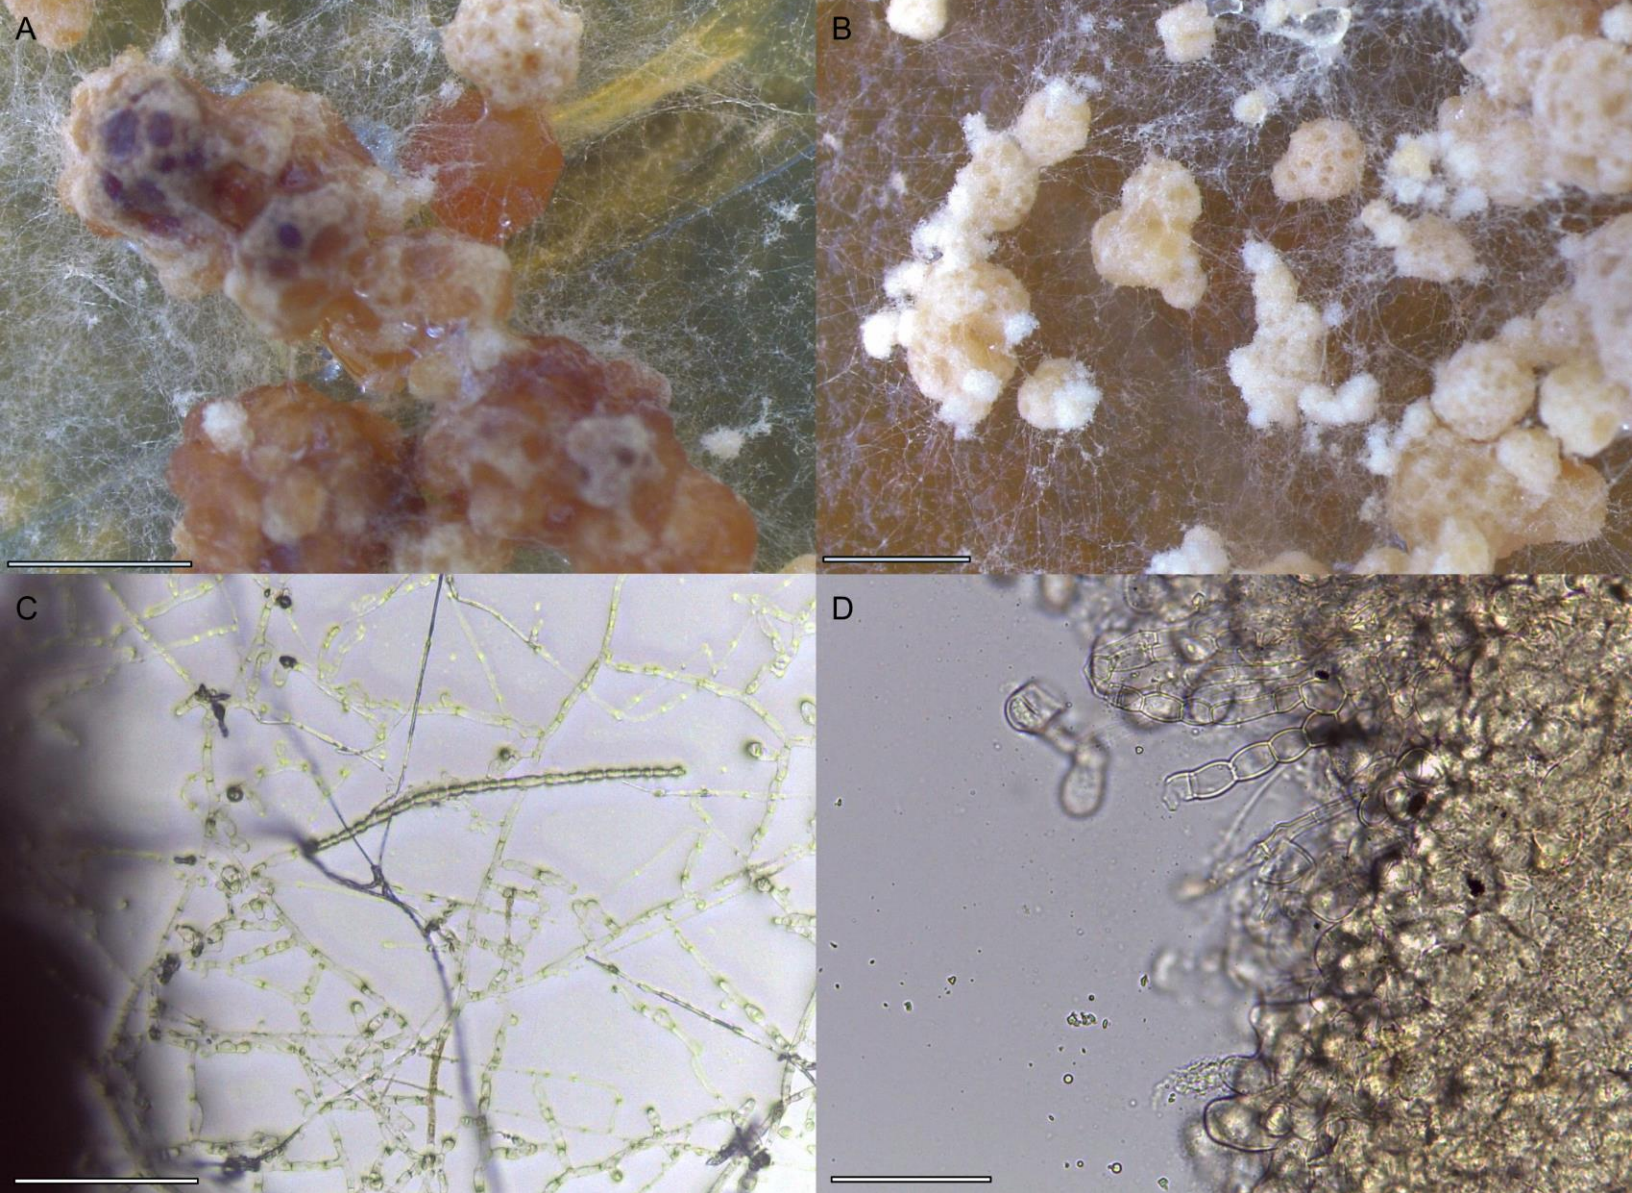

**Supplementary Figure S9.** *Phylloscypha phyllogena* (MSC0286083) sclerotia and chlamydospores forming on MEA. The images are from the initial plate and spores were able to interact. A. Sclerotia. B. Sclerotia. C. Chlamydospores Bar=20  $\mu$ m D. Chlamydospores. Scale Bars: A=1.5mm, B=800  $\mu$ m, C=20  $\mu$ m, D=5  $\mu$ m



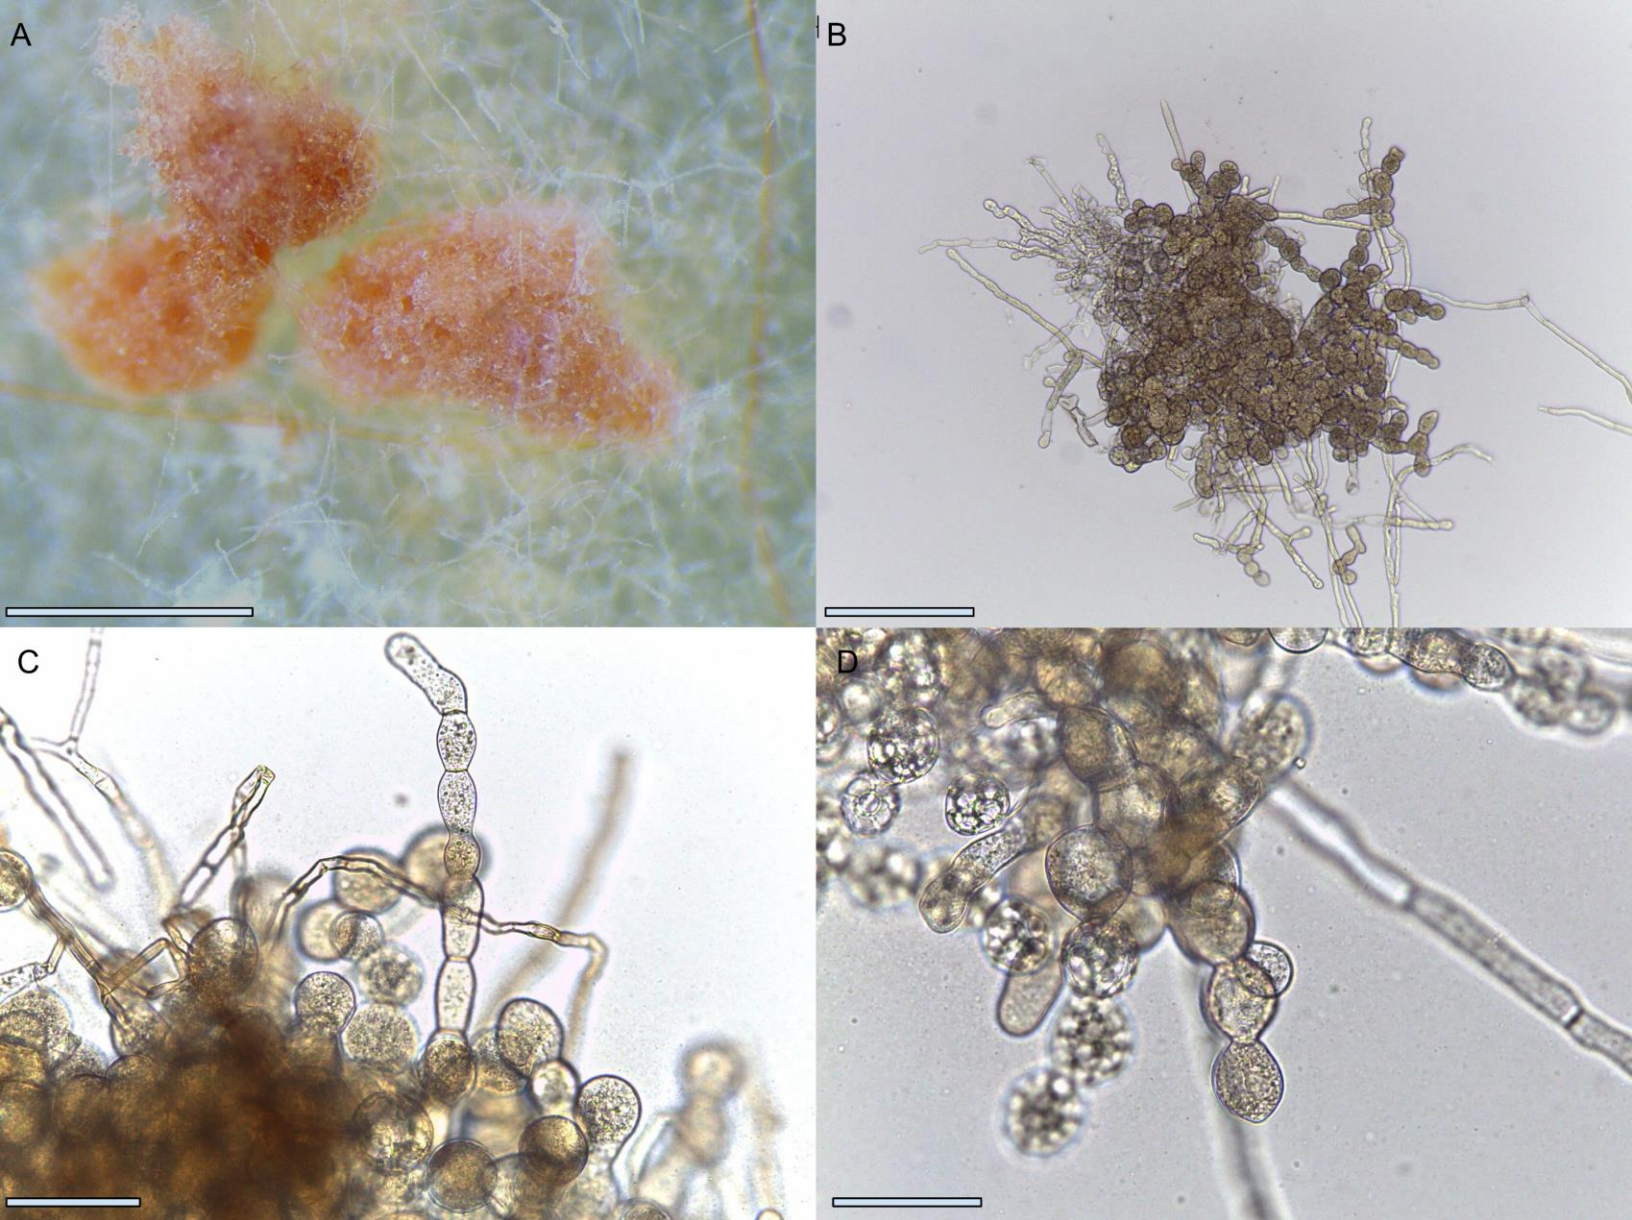

**Supplementary Figure S10.** *Morchella angusticeps* (MSC0286085) chlamydospores forming from a single spore isolate on MEA. A. Sclerotia. B. Chlamydospores C. Chlamydospores Bar = 50  $\mu$ m D. Chlamydospores. Scale Bars: A= 1.6 mm B= 200  $\mu$ m C-D= 50  $\mu$ m



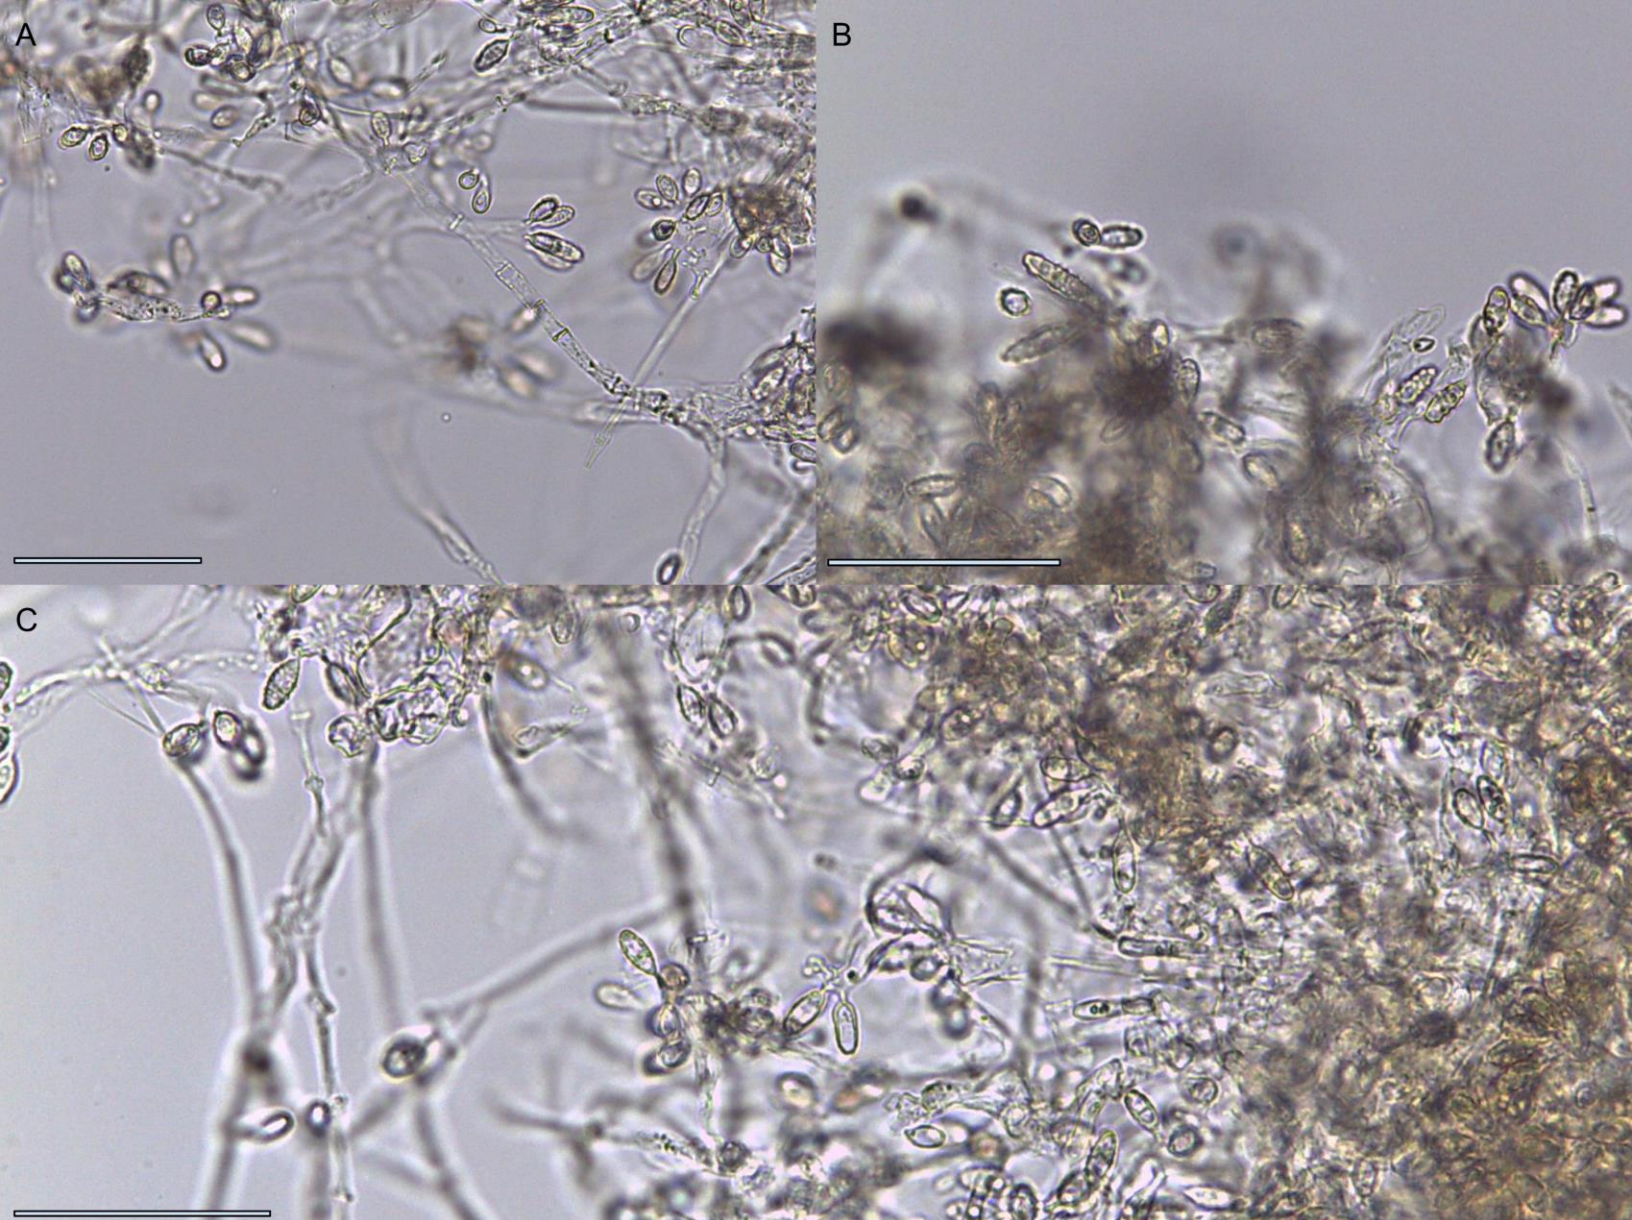

**Supplementary Figure S11.** *Peziza* sp. 1 (MSC0286080) conidia that formed from a single spore isolate growing on MMN. Scaler Bars: A-C=50 um
