# Supplementary material
Source: MDPI journal article supplement (https://www.mdpi.com/1424-2818/16/3/165)
Supplement: s1 [file s1]

Archive with 2 entries (2 files):
- diversity-2855675-supplementary.pdf
- diversity-2855675-Table S1.pdf
